# Supplementary material for: A DFT study on the stability and optoelectronic properties of Pb/Sn/Ge-based MA2B(SCN)2I2 perovskites
Source: Royal Society of Chemistry journal article supplement (doi:10.1039/d2nj03994j), 2022-01-01
Supplement: d2nj03994j1.pdf [file d2nj03994j1.pdf]

## Supplementary Information

### A DFT study on the stability and optoelectronic property of Pb/Sn/Ge-based MA<sub>2</sub>B(SCN)<sub>2</sub>I<sub>2</sub> perovskites

Qianya Ma, Jianing Liu, Yuanyuan Zhao,<sup>\*</sup> and Yongqing Qiu<sup>†</sup>

Institute of Functional Material Chemistry, Faculty of Chemistry, Northeast Normal  
University, Changchun, 130024, China

---

<sup>\*</sup> Corresponding Author. Fax: +86043185099291.  
Email addresses: yuanyuan-zhao@outlook.com (Y. Y. Zhao)  
<sup>†</sup> Corresponding Author. Fax: +86043185098768.  
E-mail addresses: qiuyq466@nenu.edu.cn (Y. Q. Qiu)

Table S1. Relative energies for the hybrid structures of MA<sub>2</sub>Pb<sub>1-x</sub>Sn<sub>x</sub>(SCN)<sub>2</sub>I<sub>2</sub> (x = 0.25, 0.50, 0.75) with different doping sites.

| System   | Doping site | Relative energies (eV) |
|----------|-------------|------------------------|
| x = 0.25 | 1           | 0                      |
|          | 2           | 0.015                  |
|          | 3           | 0.011                  |
|          | 4           | 0.027                  |
| x = 0.50 | 1           | 0                      |
|          | 2           | 0.048                  |
|          | 3           | 0.006                  |
|          | 4           | 0.040                  |
|          | 5           | 0.037                  |
|          | 6           | 0.031                  |
| x = 0.75 | 1           | 0                      |
|          | 2           | 0.010                  |
|          | 3           | 0.026                  |

Table S2. Atomic coordinates of H, C, N, S, I and Pb elements in MA<sub>2</sub>Pb(SCN)<sub>2</sub>I<sub>2</sub> structure.

|          |   |    | x     | y     | z     | Wyckoff Position |
|----------|---|----|-------|-------|-------|------------------|
| <b>1</b> | H | H1 | 0.299 | 0.543 | 0.702 | 4b               |
| <b>2</b> | H | H2 | 0.320 | 0.469 | 0.539 | 4b               |
| <b>3</b> | H | H3 | 0.371 | 0.546 | 0.620 | 4b               |
| <b>4</b> | H | H4 | 0.376 | 0.464 | 0.923 | 4b               |
| <b>5</b> | H | H5 | 0.393 | 0.381 | 0.747 | 4b               |
| <b>6</b> | H | H6 | 0.316 | 0.385 | 0.848 | 4b               |
| <b>7</b> | H | H7 | 0.201 | 0.043 | 0.202 | 4b               |
| <b>8</b> | H | H8 | 0.180 | 0.031 | 0.039 | 4b               |

|           |   |     |       |       |       |    |
|-----------|---|-----|-------|-------|-------|----|
| <b>9</b>  | H | H9  | 0.129 | 0.056 | 0.120 | 4b |
| <b>10</b> | H | H10 | 0.124 | 0.036 | 0.423 | 4b |
| <b>11</b> | H | H11 | 0.107 | 0.119 | 0.247 | 4b |
| <b>12</b> | H | H12 | 0.184 | 0.115 | 0.348 | 4b |
| <b>13</b> | H | H13 | 0.799 | 0.043 | 0.202 | 4b |
| <b>14</b> | H | H14 | 0.820 | 0.031 | 0.039 | 4b |
| <b>15</b> | H | H15 | 0.871 | 0.046 | 0.120 | 4b |
| <b>16</b> | H | H16 | 0.876 | 0.036 | 0.423 | 4b |
| <b>17</b> | H | H17 | 0.893 | 0.119 | 0.247 | 4b |
| <b>18</b> | H | H18 | 0.816 | 0.115 | 0.348 | 4b |
| <b>19</b> | H | H19 | 0.701 | 0.543 | 0.702 | 4b |
| <b>20</b> | H | H20 | 0.680 | 0.469 | 0.539 | 4b |
| <b>21</b> | H | H21 | 0.629 | 0.546 | 0.620 | 4b |
| <b>22</b> | H | H22 | 0.624 | 0.464 | 0.923 | 4b |
| <b>23</b> | H | H23 | 0.607 | 0.381 | 0.747 | 4b |
| <b>24</b> | H | H24 | 0.684 | 0.385 | 0.848 | 4b |
| <b>25</b> | H | H25 | 0.299 | 1.043 | 0.702 | 4b |
| <b>26</b> | H | H26 | 0.320 | 0.969 | 0.539 | 4b |
| <b>27</b> | H | H27 | 0.371 | 1.046 | 0.620 | 4b |
| <b>28</b> | H | H28 | 0.376 | 0.964 | 0.923 | 4b |
| <b>29</b> | H | H29 | 0.393 | 0.881 | 0.747 | 4b |
| <b>30</b> | H | H30 | 0.316 | 0.885 | 0.848 | 4b |
| <b>31</b> | H | H31 | 0.201 | 0.457 | 0.202 | 4b |
| <b>32</b> | H | H32 | 0.180 | 0.531 | 0.039 | 4b |
| <b>33</b> | H | H33 | 0.129 | 0.454 | 0.120 | 4b |
| <b>34</b> | H | H34 | 0.124 | 0.536 | 0.423 | 4b |
| <b>35</b> | H | H35 | 0.107 | 0.619 | 0.247 | 4b |
| <b>36</b> | H | H36 | 0.184 | 0.615 | 0.348 | 4b |
| <b>37</b> | H | H37 | 0.799 | 0.457 | 0.202 | 4b |

|           |   |     |       |       |       |    |
|-----------|---|-----|-------|-------|-------|----|
| <b>38</b> | H | H38 | 0.820 | 0.531 | 0.039 | 4b |
| <b>39</b> | H | H39 | 0.871 | 0.454 | 0.120 | 4b |
| <b>40</b> | H | H40 | 0.876 | 0.536 | 0.423 | 4b |
| <b>41</b> | H | H41 | 0.893 | 0.619 | 0.247 | 4b |
| <b>42</b> | H | H42 | 0.816 | 0.615 | 0.348 | 4b |
| <b>43</b> | H | H43 | 0.701 | 1.043 | 0.702 | 4b |
| <b>44</b> | H | H44 | 0.680 | 0.969 | 0.539 | 4b |
| <b>45</b> | H | H45 | 0.629 | 1.046 | 0.620 | 4b |
| <b>46</b> | H | H46 | 0.624 | 0.964 | 0.923 | 4b |
| <b>47</b> | H | H47 | 0.607 | 0.881 | 0.747 | 4b |
| <b>48</b> | H | H48 | 0.684 | 0.885 | 0.848 | 4b |
| <b>49</b> | C | C1  | 0.311 | 0.281 | 0.268 | 4b |
| <b>50</b> | C | C2  | 0.357 | 0.427 | 0.805 | 4b |
| <b>51</b> | C | C3  | 0.190 | 0.219 | 0.768 | 4b |
| <b>52</b> | C | C4  | 0.143 | 0.073 | 0.305 | 4b |
| <b>53</b> | C | C5  | 0.190 | 0.219 | 0.768 | 4b |
| <b>54</b> | C | C6  | 0.857 | 0.073 | 0.305 | 4b |
| <b>55</b> | C | C7  | 0.689 | 0.281 | 0.268 | 4b |
| <b>56</b> | C | C8  | 0.643 | 0.427 | 0.805 | 4b |
| <b>57</b> | C | C9  | 0.311 | 0.781 | 0.268 | 4b |
| <b>58</b> | C | C10 | 0.357 | 0.927 | 0.805 | 4b |
| <b>59</b> | C | C11 | 0.190 | 0.719 | 0.768 | 4b |
| <b>60</b> | C | C12 | 0.143 | 0.573 | 0.305 | 4b |
| <b>61</b> | C | C13 | 0.190 | 0.719 | 0.768 | 4b |
| <b>62</b> | C | C14 | 0.857 | 0.573 | 0.305 | 4b |
| <b>63</b> | C | C15 | 0.689 | 0.781 | 0.268 | 4b |
| <b>64</b> | C | C16 | 0.643 | 0.927 | 0.805 | 4b |
| <b>65</b> | N | N1  | 0.287 | 0.366 | 0.297 | 4b |
| <b>66</b> | N | N2  | 0.334 | 0.503 | 0.652 | 4b |

|           |   |     |       |       |       |    |
|-----------|---|-----|-------|-------|-------|----|
| <b>67</b> | N | N3  | 0.213 | 0.134 | 0.797 | 4b |
| <b>68</b> | N | N4  | 0.166 | 0.003 | 0.152 | 4b |
| <b>69</b> | N | N5  | 0.213 | 0.134 | 0.797 | 4b |
| <b>70</b> | N | N6  | 0.834 | 0.003 | 0.152 | 4b |
| <b>71</b> | N | N7  | 0.713 | 0.366 | 0.297 | 4b |
| <b>72</b> | N | N8  | 0.666 | 0.503 | 0.652 | 4b |
| <b>73</b> | N | N9  | 0.287 | 0.866 | 0.297 | 4b |
| <b>74</b> | N | N10 | 0.334 | 1.003 | 0.652 | 4b |
| <b>75</b> | N | N11 | 0.213 | 0.634 | 0.797 | 4b |
| <b>76</b> | N | N12 | 0.166 | 0.497 | 0.152 | 4b |
| <b>77</b> | N | N13 | 0.213 | 0.634 | 0.797 | 4b |
| <b>78</b> | N | N14 | 0.834 | 0.497 | 0.152 | 4b |
| <b>79</b> | N | N15 | 0.713 | 0.866 | 0.297 | 4b |
| <b>80</b> | N | N16 | 0.666 | 1.003 | 0.652 | 4b |
| <b>81</b> | S | S1  | 0.342 | 0.164 | 0.229 | 4b |
| <b>82</b> | S | S2  | 0.158 | 0.336 | 0.729 | 4b |
| <b>83</b> | S | S3  | 0.158 | 0.336 | 0.729 | 4b |
| <b>84</b> | S | S4  | 0.658 | 0.164 | 0.229 | 4b |
| <b>85</b> | S | S5  | 0.342 | 0.664 | 0.229 | 4b |
| <b>86</b> | S | S6  | 0.158 | 0.836 | 0.729 | 4b |
| <b>87</b> | S | S7  | 0.158 | 0.836 | 0.729 | 4b |
| <b>88</b> | S | S8  | 0.658 | 0.664 | 0.229 | 4b |
| <b>89</b> | I | I1  | 0.500 | 0.446 | 0.277 | 2a |
| <b>90</b> | I | I2  | 0.500 | 0.181 | 0.742 | 2a |
| <b>91</b> | I | I3  | 0.000 | 0.054 | 0.777 | 2a |
| <b>92</b> | I | I4  | 0.000 | 0.319 | 0.242 | 2a |
| <b>93</b> | I | I5  | 0.500 | 0.946 | 0.277 | 2a |
| <b>94</b> | I | I6  | 0.500 | 0.681 | 0.742 | 2a |
| <b>95</b> | I | I7  | 0.000 | 0.554 | 0.777 | 2a |

|            |    |     |       |       |       |    |
|------------|----|-----|-------|-------|-------|----|
| <b>96</b>  | I  | I8  | 0.000 | 0.819 | 0.242 | 2a |
| <b>97</b>  | Pb | Pb1 | 0.500 | 0.196 | 0.234 | 2a |
| <b>98</b>  | Pb | Pb2 | 0.000 | 0.304 | 0.734 | 2a |
| <b>99</b>  | Pb | Pb3 | 0.500 | 0.696 | 0.234 | 2a |
| <b>100</b> | Pb | Pb4 | 0.000 | 0.804 | 0.734 | 2a |

Table S3. Average interatomic distances B-I and B-S (in Å) for MA<sub>2</sub>B(SCN)<sub>2</sub>I<sub>2</sub> (B = Pb, Sn, Ge) and MA<sub>2</sub>Pb<sub>1-x</sub>Sn<sub>x</sub>(SCN)<sub>2</sub>I<sub>2</sub> (x = 0.25, 0.50, 0.75) perovskites.

| system   | Apical |       |       | Equatorial |       |       | B-S   |       |       |
|----------|--------|-------|-------|------------|-------|-------|-------|-------|-------|
|          | Pb-I   | Sn-I  | Ge-I  | Pb-I       | Sn-I  | Ge-I  | Pb-S  | Sn-S  | Ge-S  |
| B = Pb   | 3.204  |       |       | 3.321      |       |       | 3.019 |       |       |
| B = Sn   |        | 3.173 |       |            | 3.322 |       |       | 2.947 |       |
| B = Ge   |        |       | 3.123 |            |       | 3.315 |       |       | 2.785 |
| x = 0.25 | 3.204  | 3.165 |       | 3.338      | 3.336 |       | 3.010 | 2.954 |       |
| x = 0.50 | 3.202  | 3.199 |       | 3.349      | 3.343 |       | 3.012 | 2.953 |       |
| x = 0.75 | 3.216  | 3.175 |       | 3.349      | 3.343 |       | 3.012 | 2.959 |       |

Table S4. Calculated bond angles of B-I-B (°) along the x-y plane for MA<sub>2</sub>B(SCN)<sub>2</sub>I<sub>2</sub> (B = Pb, Sn, Ge) and MA<sub>2</sub>Pb<sub>1-x</sub>Sn<sub>x</sub>(SCN)<sub>2</sub>I<sub>2</sub> (x = 0.25, 0.50, 0.75) perovskites.

| system   | Pb-I-Pb | Sn-I-Sn | Ge-I-Ge |
|----------|---------|---------|---------|
| B = Pb   | 164.710 |         |         |
| B = Sn   |         | 163.431 |         |
| B = Ge   |         |         | 159.498 |
| x = 0.25 | 164.263 |         |         |
| x = 0.50 | 163.855 | 164.667 |         |
| x = 0.75 |         | 164.036 |         |

Table S5. Total energy of decomposed fragments after optimized for MA<sub>2</sub>B(SCN)<sub>2</sub>I<sub>2</sub> (B = Pb, Sn, Ge) and MA<sub>2</sub>Pb<sub>1-x</sub>Sn<sub>x</sub>(SCN)<sub>2</sub>I<sub>2</sub> (x = 0.25, 0.50, 0.75).

| System | Com. | E(eV)   | Com.                 | E(eV)   | Com. | E(eV) |
|--------|------|---------|----------------------|---------|------|-------|
| B = Pb | 2MAI | -84.918 | Pb(SCN) <sub>2</sub> | -46.265 | -    | -     |
| B = Sn | 2MAI | -84.918 | Sn(SCN) <sub>2</sub> | -46.374 | -    | -     |
| B = Ge | 2MAI | -84.918 | Ge(SCN) <sub>2</sub> | -45.082 | -    | -     |

|            |      |         |                               |         |                               |         |
|------------|------|---------|-------------------------------|---------|-------------------------------|---------|
| $x = 0.25$ | 2MAI | -84.918 | $0.75\text{Pb}(\text{SCN})_2$ | -34.699 | $0.25\text{Sn}(\text{SCN})_2$ | -11.594 |
| $x = 0.50$ | 2MAI | -84.918 | $0.50\text{Pb}(\text{SCN})_2$ | -23.133 | $0.50\text{Sn}(\text{SCN})_2$ | -23.187 |
| $x = 0.75$ | 2MAI | -84.918 | $0.25\text{Pb}(\text{SCN})_2$ | -11.566 | $0.75\text{Sn}(\text{SCN})_2$ | -34.781 |

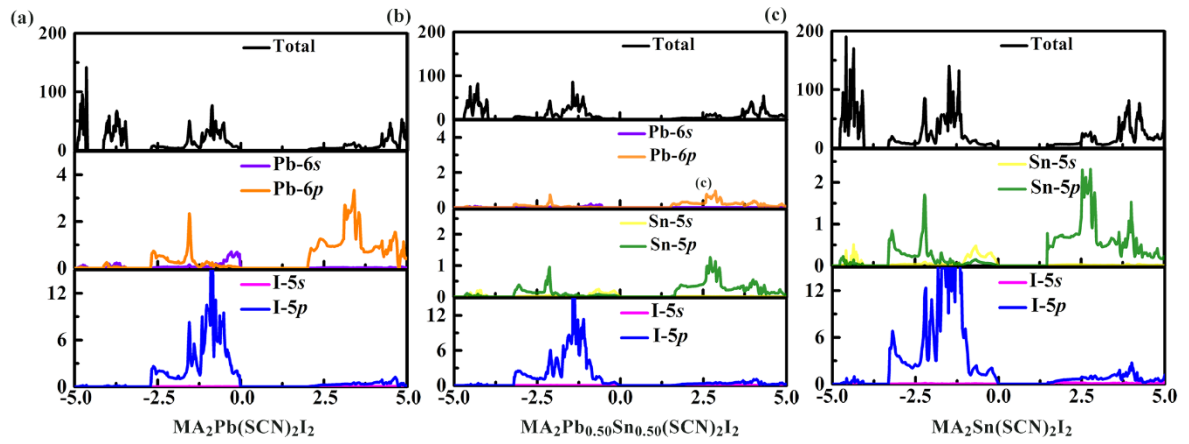

Figure S1. Respective PDOS of Pb, Sn and I atoms for (a)  $\text{MA}_2\text{Pb}(\text{SCN})_2\text{I}_2$ , (b)  $\text{MA}_2\text{Pb}_{0.50}\text{Sn}_{0.50}(\text{SCN})_2\text{I}_2$ , and (c)  $\text{MA}_2\text{Sn}(\text{SCN})_2\text{I}_2$  compounds.
